Isometric Spiracular Scaling in Scarab Beetles: Implications for Diffusive and Advective  
Oxygen Transport

Julian M. Wagner<sup>1</sup>, C. Jaco Klok<sup>1</sup>, Meghan E. Duell<sup>1</sup>, John J. Socha<sup>2</sup>, Guohua Cao<sup>3</sup>, Hao Gong<sup>4</sup>,  
Jon F. Harrison<sup>1</sup>

<sup>1</sup>*School of Life Sciences, Arizona State University, Tempe, AZ 85287-4501, USA*

<sup>2</sup>*Department of Biomedical Engineering and Mechanics, Virginia Tech, VA 24061, USA*

<sup>3</sup>*School of Biomedical Engineering, ShanghaiTech University, Shanghai 201210, CHINA*

<sup>4</sup>*Department of Radiology, Mayo Clinic, MN 55902, USA*

Short title: Spiracle scaling of beetles

Corresponding author: Jon Harrison, School of Life Sciences, Arizona State University, Tempe,

AZ 85287-4501 USA, +1 (480)-965-9459; [j.harrison@asu.edu](mailto:j.harrison@asu.edu)

1 **Abstract**

2           The scaling of respiratory structures has been hypothesized to be a major driving factor in  
3 the evolution of many aspects of animal physiology. Here we provide the first assessment of the  
4 scaling of the spiracles in insects using ten scarab beetle species differing 180x in mass,  
5 including some of the most massive extant insect species. Using X-ray microtomography, we  
6 measured the cross-sectional area and depth of all eight spiracles, enabling the calculation of  
7 their diffusive and advective capacities. Each of these metrics scaled with geometric isometry.  
8 Because diffusive capacities scale with lower slopes than metabolic rates, the largest beetles  
9 measured require 10-fold higher PO<sub>2</sub> gradients across the spiracles to sustain metabolism by  
10 diffusion compared to the smallest species. Large beetles can exchange sufficient oxygen for  
11 resting metabolism by diffusion across the spiracles, but not during flight. In contrast, spiracular  
12 advective capacities scale similarly or more steeply than metabolic rates, so spiracular advective  
13 capacities should match or exceed respiratory demands in the largest beetles. These data  
14 illustrate a general principle of gas exchange: scaling of respiratory transport structures with  
15 geometric isometry diminishes the potential for diffusive gas exchange but enhances advective  
16 capacities; combining such structural scaling with muscle-driven ventilation allows larger  
17 animals to achieve high metabolic rates when active.

18 **Keywords**

19           Spiracle, scaling, Scarabaeidae, tracheal system, body size, oxygen transport

## 20 MAIN TEXT

### 21 Introduction

22 As animal species evolve different sizes, many aspects of their physiology and  
23 morphology scale disproportionately with one another (allometrically) with consequences for  
24 animal behavior, life history, evolution, and diversity (1-3). A driver of this disproportionality  
25 lies in the nonlinear scaling of geometry: doubling the radius of a sphere gives quadruple the  
26 surface area and octuple the volume; in a similar way, scaling up a small body plan gives  
27 drastically altered ratios of surface area, volume, and body length. Since the challenges  
28 associated with changes in body size have a geometric origin, they are ubiquitous. As a result,  
29 understanding the mechanisms animals use to overcome the effects of changes in geometric  
30 proportions remains a pervasive, important, and challenging biological problem. Three related  
31 aspects of animal function modulated by allometry are scaling of animal metabolic rates, often  
32 scaling with mass<sup>0.75</sup> (4, 5), limits on the maximal body sizes of specific taxa (6, 7), and gas  
33 exchange strategies (8). For gas exchange, volume of tissue and hence potential gas exchange  
34 needs of animals scale with the cube of length (like the sphere), while surface areas tend to scale  
35 with the square of length. This leads to a decline in the ratio of surface area to volume with size.  
36 As a consequence, when animals evolve larger sizes, they may need to adapt the proportions of  
37 their respiratory structures or increase the use of advection (bulk flow) to avoid facing limitations  
38 based on processes that depend more on surface area such as diffusion.

39 Limitations on the capacity of larger animals to support oxygen delivery to tissues have  
40 been proposed to drive the hypometric scaling of metabolic rates with size, as well as the  
41 hypometric scaling of many physiological (e.g., heart and ventilation rates) and

42 behavioral/ecological traits (e.g., territory size, dispersal distance) (1-4, 9). However, competing  
43 theories suggest that other factors, such as heat dissipation constraints, nutrient uptake  
44 constraints, or performance-safety trade-offs, drive the hypometric scaling of metabolic rates and  
45 correlated variables, and that evolutionary adaptations of respiratory systems to size allow  
46 animals to match oxygen supply to need regardless of body size (10-13). One important step in  
47 resolving this controversy is determining how respiratory structures and mechanisms scale. The  
48 vast majority of prior studies of the scaling of gas exchange structures have focused on  
49 vertebrates, especially mammals. In contrast, there is relatively limited information on the  
50 scaling of gas exchange structures in invertebrates, despite the fact that most animal species are  
51 invertebrates (5, 14). The scaling of the insect respiratory system is of particular interest, as  
52 aspects of tracheal system structure have been reported to scale hypermetrically, in contrast to  
53 the isometric or hypometric scaling of respiratory structures in vertebrates, supporting the  
54 hypothesis that possession of a tracheal respiratory system limits insect body size (6, 15-18).  
55 Here, we report the first study of the scaling of insect spiracles, the gateway of air into the body  
56 and the first step in oxygen delivery from air to tissues, presenting new insight into a key  
57 morphological pathway in this most biodiverse clade of terrestrial animals.

58 Gas exchange usually occurs in a series of steps, often a sequence of alternating diffusive  
59 and advective processes. The capacity for a respiratory surface to conduct oxygen (diffusive  
60 conductance,  $G_{\text{diff}}$ ) can be described using Fick's law, that is

61 
$$(1) G_{\text{diff}} = \frac{\text{area}}{\text{thickness}} * K.$$

62 where  $K$  is Krogh's diffusion constant for oxygen in the barrier. The diffusive oxygen exchange  
63 across the surface ( $J_{\text{diff}}$ , mol sec<sup>-1</sup>) is given by

64  $(2) J_{\text{diff}} = G_{\text{diff}} * \Delta P_{\text{O}_2}.$

65 where  $\Delta P_{\text{O}_2}$  is the partial pressure gradient for oxygen across the exchanger. When gas exchange  
66 relies on diffusion across a barrier, either  $G_{\text{diff}}$  or  $\Delta P_{\text{O}_2}$  must increase to match the increased  
67 oxygen demand inherent in a larger body size (a larger relative tissue volume), or oxygen supply  
68 will limit metabolic rate. Increases in  $G_{\text{diff}}$  may be accomplished by either a decrease in diffuser  
69 thickness or increase in area. The  $\Delta P_{\text{O}_2}$  from air to mitochondria can be no greater than  
70 atmospheric  $P_{\text{O}_2}$  (approximately 21 kPa at sea level); this biophysical constraint sets an upper  
71 limit on the ability of large animals to utilize increases in  $\Delta P_{\text{O}_2}$  to overcome a  $G_{\text{diff}}$  that does not  
72 increase in proportion to oxygen consumption rate.

73 The scaling of surface area, barrier thickness, and  $\Delta P_{\text{O}_2}$  for gas exchangers across species  
74 of animals varies with clade and developmental stage. In adult vertebrates, the scaling of the  
75 passive diffusing capacity of the lung across species scales hypometrically, but matches the  
76 scaling of metabolic rates (5). However, the scaling of respiratory morphology differs in  
77 endotherms and ectotherms (5), as barrier thickness is constant with size in ectotherms, but  
78 increases with size in endotherms. As a consequence, endotherms must scale surface area of the  
79 lung more steeply than ectotherms to account for their increased barrier thickness and match the  
80 scaling of  $G_{\text{diff}}$  to the scaling of metabolic rate. Bird eggs, which rely on diffusion through pores  
81 for oxygen, employ a different strategy. Eggs of larger species have relatively thicker shells  
82 (scaling with  $\text{mass}^{0.45}$ ), increasing barrier thickness with size, likely to mitigate a higher  
83 likelihood of mechanical damage (19). Pore area increases proportionally with shell thickness, so  
84  $G_{\text{diff}}$  per pore is relatively constant across egg size, and larger eggs have a higher density of pores  
85 (20). The scaling of the  $G_{\text{diff}}$  of the shell overall matches the scaling of metabolic rate across

86 species, with both scaling hypometrically (19, 20). Pycnogonids (sea spiders) show yet another  
87 pattern for the diffusing capacity of their respiratory structures (their legs). Unlike either bird  
88 eggs or vertebrate lung membranes, pycnogonid barrier thickness scales isometrically (7). As in  
89 bird eggs, there is an increase in the area-specific diffusing capacity of the leg cuticle of larger  
90 pycnogonids, although the morphological basis remains unclear (7). However, the increases in  
91 diffusive conductance of the respiratory exchanger are not sufficient to match increases in  
92 metabolic rates with size, so the  $\Delta P_{O_2}$  across the leg cuticle increases in larger pycnogonid  
93 species, which may limit maximal species size in this taxa (7).

94 Advective steps in gas exchange can occur using either air or aqueous media and  
95 represent a second broad strategy for delivering gases to tissues. The morphological capacity for  
96 a structure to transport a fluid by advection,  $G_{adv}$ ,  $m^4 s kg^{-1}$ , can be described from Poiseuille's  
97 law,

$$98 \quad (3) \quad G_{adv} = \frac{\text{area}^2}{8 * \text{dynamic viscosity} * \text{length}}$$

99 Given this relationship, the advective transport of oxygen through the structure ( $J_{adv}$ ,  $mol sec^{-1}$ ) is  
100 is given by

$$101 \quad (4) \quad J_{adv} = G_{adv} * [O_2] * \Delta HP.$$

102 where  $[O_2]$  is the concentration of  $O_2$  in the fluid ( $mol m^{-3}$ ), and  $\Delta HP$  is the hydrostatic pressure  
103 gradient across the structure ( $kg m^{-1} sec^{-2}$ ). Some examples in mammals illustrate how  
104 morphology scales for structures relying on advection. In mammals, the radius of the aorta scales  
105 with  $mass^{0.375}$ , and the length of the aorta scales with  $mass^{0.25}$ , suggesting that  $G_{adv}$  of the aorta  
106 scales with  $mass^{1.25}$  ( $4 * 0.375 - 0.25$ ) (21). The tracheal-bronchial system is the advective  
107 structure for air transport in vertebrates; radius scales with  $mass^{0.39}$  while lengths scale with

108  $\text{mass}^{0.27}$ , suggesting that  $G_{\text{adv}}$  for mammalian aorta and bronchial systems scale with  $\text{mass}^{1.29}$   
109 (22).  $G_{\text{diff}}$  for these same structures, on the other hand, scale as  $\text{mass}^{0.5}$ . Thus, the morphological  
110 structures of mammalian respiratory systems seem to scale such that advective capacities  
111 increase more than metabolic rates in larger species, while diffusive capacities decline. Of  
112 course, mammalian oxygen transport through the bronchial tree and circulatory system is thought  
113 to rely on advection regardless of size.

114         The design of the insect tracheal system is fundamentally different from either the  
115 vertebrate respiratory system or that of skin-breathing aquatic invertebrates; and it remains  
116 unclear how the components of the system scales. In insects, spiracles provide a (usually) gated  
117 opening to an air-filled conduit system that branches through the insect, with oxygen transported  
118 in the gas phase to the most distal surface of the tracheoles, with transport then occurring in the  
119 liquid phase from tracheole to mitochondria (23). Since Krogh's demonstration that diffusion  
120 should suffice for oxygen transport in a relatively large Lepidopteran larvae, diffusion has been  
121 considered to be an important mechanism of gas exchange in insects (24, 25). However, many  
122 insects, including small ones, supplement diffusion with advection, especially when active (23,  
123 26, 27). The spiracles are potentially an important step in insect gas exchange, since they are  
124 relatively small (difficult to see by eye in most insects) and yet must sustain all gas flux. It  
125 appears that spiracle morphology just matches gas exchange needs at peak metabolic  
126 performance with little additional capacity; for example, sealing of just one thoracic spiracle  
127 reduces flight metabolic rate in *Drosophila* (28). At present it is not clear whether the size of  
128 spiracles should best match  $G_{\text{diff}}$ ,  $G_{\text{adv}}$  or some other physiological capacity. To shed light on this  
129 question, we used micro-computed tomography (micro-CT) (29) to provide the first interspecific

130 examination of the scaling of spiracles, using ten species of scarab beetles spanning two orders  
131 of magnitude in mass, including some of the most massive extant species.

## 132 **Methods**

### 133 *Acquisition of raw micro-CT images*

134         Seventeen individuals of ten species (1-2 individuals per species) of scarab beetles (Fig.  
135 1a) with a size range from 0.097 to 18 grams were obtained via breeders from online sources.  
136 We examined the following species: *Goliathus goliathus*, *Coelorrhina hornimani*, *Dicronorrhina*  
137 *derbyana*, *Mecynorrhina torquata*, *Eudicella euthalia*, *Protaetia orientalis*, *Popilia japonica*,  
138 *Trypoxylus dichotomus*, *Dynastes hercules*, and *Cyclocephalis borealis*. Most species had both  
139 male and females represented. Most specimens were scanned using a micro-CT scanner  
140 (Skyscan 1172, Bruker, Billerica, MA, USA) equipped with a Hamamatsu 1.3 MP camera and  
141 Hamamatsu SkyScan Control software at Virginia Tech. To maintain tracheal structure in their  
142 natural configuration, we used a minimal preparation of fresh samples (30). All beetles were  
143 killed using ethyl acetate fumes, stored at 4 °C, and scanned within three days. They were  
144 warmed back to room temperature to avoid motion artifacts from fluid flow, placed in X-ray  
145 translucent polyimide tubing (Kapton, Dupont), and centered on a brass stage with putty. Power  
146 was set at 10 W, voltage was adjusted for optimum brightness and contrast (70-96 kV), with  
147 currents between 104-141  $\mu$ A. Beetles were scanned with 0.4° rotation steps for 180° with frame  
148 averaging. A flat-field correction was applied to all scans to account for subtract aberrations. All  
149 raw projection images were collected a size of 1024 x 1280 pixels, yielding a scaling of 12-98  
150  $\mu$ m/pixel that was independent of beetle size. Average measured spiracle dimensions for  
151 width/height/depth for the smallest beetles were around 10 pixels and hence resolvable with  
152 minimally 10% resolution. Small beetles could be captured in a single scan, but larger beetles



153 were scanned sequentially in segments along their longitudinal axis by varying their position  
154 relative to the beam.

155 *Dynastes hercules* were too large to be scanned with the same instrument, so these  
156 beetles were imaged using an in-house-built bench-top micro-focus X-ray computed tomography  
157 (micro-CT) platform (see (31, 32) for details) at Virginia Tech. The X-ray tube (Oxford  
158 Instrument, Inc.) was operated at 70 kV and tube power was fixed at 20 W. Images were  
159 collected with an X-ray flat-panel detector (model C7921, Hamamatsu, Inc.) operated at 1x1  
160 binning mode, with a detector element size of 50 x 50  $\mu\text{m}$ . The axial scanning field-of-view  
161 (FOV) was 37.2 mm in diameter. In each scan, images were collected at 0.5° intervals as the  
162 beetle was rotated through 360°, resulting in a total of 720 X-ray projections per scan. Because  
163 the specimen was larger than the field of view, multiple scans were conducted sequentially along  
164 the animal's anterior-posterior axis to image the entire body. The axial slice images were  
165 reconstructed using the standard filtered back-projection (FBP) reconstruction algorithm, with an  
166 image matrix of 1008 x 1012 px and an isotropic pixel size of 36.8 x 36.8  $\mu\text{m}$ .

#### 167 *Image Reconstruction and Measurements*

168 Raw micro-CT images were imported into NRecon reconstruction software from  
169 SkyScan (Bruker, Billerica, MA, USA). Ring artifact and beam hardening corrections were  
170 applied where necessary, and contrast was optimized using the software's interactive histogram  
171 feature. For large beetles that required multiple scans, reconstructions were set to align and fuse  
172 automatically. Slices generated in NRecon were imported into Avizo 9 software (ThermoFisher  
173 Scientific, Waltham, MA, USA) for 3D reconstructions.

174 Spiracles were identified by the characteristic slit-like shape of the opening, and the  
175 bellows-shaped air sac behind it (Figure 1b, 1c, 1d). Spiracle locations were confirmed by

176 dissection on representative specimens. Measurements were taken for one of the paired six  
177 abdominal and two thoracic spiracles for each beetle (Figure 1b,1c). A few scans had small  
178 aberrant regions (e.g., blurriness) due to challenges in scanning, so which spiracle was measured  
179 varied between the symmetric right and left side of an animal based on which region of the scan  
180 was best resolved. Diameters of the spiracular opening were measured at the widest point of  
181 opening to the outside air in the transverse and sagittal planes. Area of the opening was then  
182 calculated assuming an elliptical shape, with the lengths of the semi-major/minor axes being the  
183 diameters measured in the transverse and sagittal planes (Figure 1d). The depth of the spiracle  
184 was measured from the outer opening to the interior valve connecting the spiracle to the tracheal  
185 trunk (Figure 1d). The sex, mass and dimensions of all measured spiracles are provided in  
186 supplementary tables 1 and 2.

### 187 *Calculations and Statistical Analyses*

188 We measured the scaling relationships for each spiracle separately, using log-log plots.  
189 As dependent variables in these regressions, we tested  $\log_{10}$  transformed spiracular depth, area,  
190 area/depth (as an index of the diffusive capacity of the spiracle, see Eq. 1), and  $\text{area}^2/\text{depth}$  (as an  
191 index of the resistance of the spiracle to advective flow, see Eq. 3).

192 We used two statistical approaches to assess the role of the phylogenetic relatedness of  
193 the animals in scaling patterns: a phylogenetic generalized linear model (pGLS) and a generative  
194 Bayesian model. We ran and plotted pGLS results in R (33-39). The goal of pGLS is to account  
195 for non-independence of data points due to phylogenetic relatedness in construction of the linear  
196 model, which requires a phylogeny of the study species (40). We spliced together such a  
197 phylogeny from multiple published scarab phylogenies. The branch positions for beetle  
198 subfamilies (Dynastinae, Rutelinae and Cetoniinae) were determined using Hunt et al. (41). The

199 branches within Dynastinae were placed in the tree using work from Rowland and Miller (42),  
200 and the branches of Cetoniinae determined with two trees, one from Mico et al. (43, 44) and the  
201 other Holm (43, 44). Four of the genera in this study were present in the tree for Coleoptera  
202 constructed by Bocak et al. (45), which indicated the same branch places as our spliced tree,  
203 providing some positive confirmation for this tree structure. Branch lengths were set to a value of  
204 one because actual branch lengths are not known. Similar to pGLS, we built a Bayesian model  
205 assuming that the data were generated by a multivariate normal distribution with the covariance  
206 matrix given by the amount of shared ancestry between species (amount of shared branch  
207 length). See supplemental methods for the details of the model, selection of priors, and python  
208 code. Detailed information on the analysis is available at the website for the paper here:  
209 [https://julianmwagner.github.io/spiracle\\_scaling/](https://julianmwagner.github.io/spiracle_scaling/) and at the corresponding repository  
210 ([https://github.com/julianmwagner/spiracle\\_scaling](https://github.com/julianmwagner/spiracle_scaling)). Analyses indicated that the parameter  
211 characterizing the degree of phylogenetic signal in our data ( $\lambda$ ) was non-identifiable  
212 (supplemental figures 1,2); this result means that our data does not inform this parameter and it  
213 could take on any value from zero (no phylogenetic signal) to one (strong phylogenetic signal)  
214 with similar probability. Hence, we opted to omit the use of phylogenetic covariance from our  
215 models since 1) the total non-identifiability made selecting a single  $\lambda$  via maximum likelihood  
216 for the frequentist pGLS dubious, and 2) including it added no explanatory value to our Bayesian  
217 regression (parameter samples for  $\lambda$  were essentially straight from the prior). We instead used  
218 nonparametric bootstrapping (10,000 bootstrap replicates with ordinary least squares regression  
219 slopes/intercepts/residual standard deviation as the summary statistics) to obtain confidence  
220 intervals for our slope and intercept values. Additionally, we performed a Bayesian linear  
221 regression. Our model was a normal likelihood with mean given by a line with slope and

222 intercept parameters. To obtain parameter estimates, we sampled using the Stan implementation  
223 of Hamiltonian Monte Carlo (cmdstanpy) in Python. See supplemental methods for the details of  
224 the model, selection of priors, and Python code and at the paper website/repository listed above.  
225 No data were excluded.

226 We defined isometric scaling as scaling as follows:

227  $\text{mass}^{0.67}$  for areas

228  $\text{mass}^{0.33}$  for area/depth

229  $\text{mass}^1$  for  $\text{area}^2/\text{depth}$ ,

230 according to basic principles of geometric similarity (assuming mass is proportional to volume).

231 We observed whether the 95% confidence interval given by bootstrapping/parameter samples for  
232 the slope of our measures of spiracle morphology overlapped with the isometric prediction. To  
233 produce any  $p$  values, we calculated the number of bootstrap replicates with test statistic at least  
234 as extreme as a particular value of interest, e.g. slope compared to isometry.

235 The diffusive capacity of a spiracle ( $G_{\text{diff}}$ ,  $\text{nmol sec}^{-1} \text{kPa}^{-1}$ ) at  $25^\circ\text{C}$  was calculated using  
236 equation 1, with  $K$  calculated as  $D * \beta$ , with  $D$  (the diffusivity constant for  $\text{O}_2$  in air) =  $0.178 \text{ cm}^2$   
237  $\text{sec}^{-1}$  (46) and  $\beta$  (the capacitance coefficient for oxygen in air) =  $404 \text{ nmol cm}^{-3} \text{kPa}^{-1}$  (47). The  
238  $\Delta\text{PO}_2$  across the spiracles if gas exchange occurs completely by diffusion was calculated for  
239 various oxygen consumption rates using equation 2. Advective capacity was calculated using  
240 equation 3, assuming a dynamic viscosity of air of  $1.86 \times 10^{-8} \text{ kPa sec}$  (46). To calculate total  
241 diffusive or advective capacity per beetle, the diffusive/advective capacity for all eight spiracles  
242 was summed and doubled (to obtain the total for both sides of the animal).

243 To calculate the  $\Delta\text{PO}_2$  across the spiracles needed to supply the beetle's total resting  
244 metabolic demand by diffusion, the metabolic rate for a quiescent beetle at a body temperature of

245 25 °C of a given mass was estimated from (48) with the following equation:  $\log_{10}(\text{metabolic rate}$   
246  $(\mu\text{W})) = 3.2 + 0.75 \cdot \log_{10}(\text{mass (g)})$ . This metabolic rate was converted to an oxygen  
247 consumption rate assuming an RQ of 0.85 (20.7  $\mu\text{j nL}^{-1}$ ).

248 Estimating the scaling of gas exchange during flight of flying beetles has uncertainties.  
249 Niven and Scharlemann calculated a scaling coefficient for insect flight of 1.07 (49). Duell and  
250 Harrison recently re-assessed the scaling of flight metabolism in insects, and found that the  
251 scaling coefficients for flight metabolic rates depended on insect size, with a scaling coefficient  
252 of 1.19 for insects weighing less than 58 mg and of 0.67 for insects weighing more than 58 mg  
253 (50). As all of the beetles used in this study were larger than 58 mg, it seems likely that their  
254 flight metabolic rates scale hypometrically, with a slope less than 1. Scaling patterns can vary  
255 across clades (51, 52), so ideally, we would employ measures of the flight metabolic rates of the  
256 scarab beetles in this study. Unfortunately, most beetles cannot sustain flight in the small  
257 containers required for respirometry. Flight metabolic rates have as yet only been reported for  
258 four species (50), and the slope of the scaling relationship for these four species has great  
259 uncertainty. Thus, based on the current literature, the scaling exponent flight metabolic rates in  
260 insect likely ranges between 0.67 and 1.19, depending on size.

261 For calculations of the partial pressure gradient across the spiracles during flight, a  
262 critical factor is the magnitude of the aerobic scope. Three studies to date measured resting and  
263 flight metabolic rates for beetles ranging in body mass from 0.3 to 1.3 g; two used tethered flight  
264 and one free flight (53-55). Because it is challenging to induce maximal flight performance and  
265 measure aerobic metabolic rate, and we are interested in what the oxygen partial pressure  
266 gradient might be across the spiracles during maximal flight performance, we used the highest  
267 aerobic scopes reported for individual beetles in these studies, which were 80, 90 and 110x

268 higher than resting metabolic rates. We used the median of these values (90x) to estimate  
269 maximal aerobic metabolic rate during flight relative to quiescent 1 gram beetles. Because there  
270 is uncertainty in the scaling of metabolic rates during flight, the required PO<sub>2</sub> gradient across the  
271 spiracles to support gas exchange by diffusion at rest and during flight was calculated by  
272 rearranging equation 2 and performing unit conversions as follows:

$$273 \quad (5) \Delta PO_2 \text{ (kPa)} = \left( \frac{\left( 10^{\log_{10}(AS) + 3.20 + EXP * \log_{10}(\text{mass (g)})} \right) \mu W \left( \frac{1 \frac{\mu J}{s}}{1 \mu W} \right) \left( \frac{nL}{20.7 \mu J} \right) \left( \frac{1 \text{ nmol}}{24.5 nL} \right)}{\left( \frac{\text{area}}{\text{depth}} \text{ (cm)} \right) \left( 0.178 \frac{\text{cm}^2}{\text{sec}} \right) \left( 404 \frac{\text{nmol}}{\text{cm}^3 \text{ kPa}} \right)} \right)$$

274 where conversion factors of 20.7 kJ/L and 24.5 mol/L were assumed for O<sub>2</sub> at 25 °C, AS is the  
275 aerobic scope (1 for resting [ $\log_{10}(1)=0$  in the equation] and 90 for a flying 1 g insect  
276 [ $\log_{10}(90)=1.954$  in the equation]), and EXP is the scaling exponent for metabolic rate.

## 277 **Results**

278 All spiracles scaled with geometric isometry for area, depth, area/depth (which  
279 corresponds to diffusive capacity), and area<sup>2</sup>/depth (which corresponds to advective capacity)  
280 (figure 2, supplemental figures 3-7, supplementary tables 3 and 4). Some example regressions  
281 with confidence intervals for the slopes are shown in figure 2, illustrating scaling isometry, the  
282 larger size of the mesothoracic spiracle, and the tight size distribution of the more anterior  
283 spiracles as compared to the posterior; regressions and confidence intervals for each spiracle are  
284 in supplementary table 4. The mesothoracic spiracle was much larger than any of the other  
285 spiracles, consistent with the general trend of increasing spiracular area closer to the anterior of  
286 the animal (supplemental figure 3, supplementary table 3). The area of the mesothoracic  
287 spiracles was approximately four times larger than both the metathoracic spiracles, and  
288 abdominal spiracles 1-3, and abdominal spiracles 4-6 were approximately half the size of the

289 more anterior abdominal spiracles (supplemental figure 3). Not only were anterior spiracles  
290 larger than posterior, but they also had much lower variability around the trend line within the  
291 species assayed in this study (figure 2a,b,c). In comparison, the depth of the spiracles showed  
292 much less variability in tightness of the distribution around the scaling trend lines (figure 2d,e,f).

293 As with individual spiracles, the combined diffusing capacity of all the spiracles scaled  
294 isometrically, with a slope not significantly different from 0.33 (Fig. 3a, Supplementary table 5).  
295 The upper 95% confidence limit for this slope was 0.505, well less than any reported  
296 interspecific scaling exponent for metabolic rate. For resting metabolic rate, (slope of 0.75,  
297 shown as the repeated light grey background lines), the required  $pO_2$  gradient across spiracles  
298 necessary to supply oxygen by diffusion was small but increased by an order of magnitude, from  
299 about 0.05 kPa in the smallest beetles to nearly 0.5 kPa in the largest scarabs (Fig. 3b). For flight,  
300 we present the scaling of the required  $pO_2$  gradient across spiracles necessary to sustain maximal  
301 aerobic flight metabolic rate by diffusion for two situations, if flight metabolic scales with an  
302 exponent of 0.67 or 1.19. For small beetles, the estimated  $pO_2$  gradient across spiracles during  
303 flight was 2 - 5 kPa. Thus, plausibly, beetles in the smallest size range may be able to deliver  
304 sufficient oxygen to the tissues by diffusion, though further studies of conductance of the  
305 tracheal system between the spiracles and flight muscles will be required to answer this question.  
306 For the largest beetles, the required  $pO_2$  gradient across spiracles during flight substantially  
307 exceeded 21 kPa, indicating that during maximal aerobic flight performance, diffusion cannot  
308 supply oxygen across the spiracles, and certainly not to the flight muscles (Fig. 3b,  
309 Supplementary table 5). Regardless of whether flight metabolic rate scales with an exponent of  
310 0.67 or 1.19, because metabolic rates increase more with size than spiracular diffusing capacity,

311 the required  $pO_2$  gradient across spiracles increases with body size for diffusive gas exchange  
312 (Fig. 3b).

313 In contrast, the advective capacity increased with an estimated slope of 1.1, that was  
314 greater (95% confidence limits 0.84 – 1.34) than the minimum scaling exponent for flight  
315 metabolic rate (0.67), also greater than the estimated slope of metabolic rate for resting insects  
316 (slope of 0.75, light grey lines), but included maximum scaling exponent reported for flight  
317 metabolic rates in insects (1.19, Fig. 3c).

## 318 **Discussion**

319 Spiracles scaled with geometric isometry. Isometric scaling of diffusive capacities means  
320 that diffusion becomes increasingly less able to meet oxygen demands in larger beetles, with the  
321 required gradient for oxygen transport by diffusion through the spiracles increasing by an order  
322 of magnitude over two orders of magnitude in body mass. Conversely, our data demonstrate that  
323 the advective capacities of the spiracles scale more positively than resting metabolic rates. For  
324 flight metabolic rates, uncertainties in the scaling exponent for flight metabolic rates of beetles  
325 means that we can only conclude that the scaling exponents for advective capacities of the  
326 spiracles may match or possibly exceed those of metabolic rates. These results demonstrate that  
327 large insects must rely on advection through the spiracles in order to achieve their maximal  
328 aerobic flight metabolic rates. Our results also imply that there is no physical constraint  
329 associated with spiracular gas exchange that limits insect size and metabolic rates.

330 It is important to note that our analysis only assessed required  $pO_2$  gradient across  
331 spiracles, not within the entire tracheal system. Within the body of insects, gases must be  
332 transported through the large tracheal trunks, and then down the branching smaller tracheae and  
333 tracheoles in the gas phase, and then finally through liquid phases in the ends of the tracheoles



334 and from the tracheoles to the mitochondria. As yet, we have little information on the relative  
335 resistances of these various steps. Based on the  $P_{CO_2}$  gradient between the spiracles and tracheal  
336 trunks, and between the tracheal trunks and the hemolymph (perhaps similar to cellular  $P_{CO_2}$ ), the  
337 resistance of the internal tracheal system to  $CO_2$  transport to active muscles likely substantially  
338 exceeds that of the spiracles in active, locomoting animals, whereas spiracular and tracheal  
339 resistances may be similar in resting animals (56). This raises the interesting question of whether  
340 large insects can supply their resting metabolic rate by diffusion alone. The fact that the  
341 calculated required  $P_{O_2}$  gradient across the spiracles required to sustain resting metabolic rate for  
342 the largest beetles in this study is only 0.5 kPa would suggest that the answer is yes. This  
343 conclusion is supported by our experience (unpublished observations) that even very large larval  
344 and adult scarab beetles (> 30 g) can recover from anoxia, which strongly suggests that diffusion  
345 can sustain at least the minimal aerobic metabolic rate necessary to restart ventilation.

346         While the spiracles scale isometrically in beetles, this pattern does not occur universally  
347 for tracheal structures, or consistently across clades. Comparing tenebrionid beetles inter-  
348 specifically, the leg tracheae scale hypermetrically, but the head tracheae scale isometrically (6).  
349 Within a bumblebee species, one spiracle scales isometrically (16). In the leg of growing locust  
350 (*Schistocerca americana*), the diffusing capacity of the large longitudinal tracheae of the leg  
351 scales hypometrically (17), whereas in a growing caterpillar (*Manduca sexta*), diameters of most  
352 tracheae scale isometrically (57). Why different scaling patterns are observed in these different  
353 cases is unclear; more in-depth analysis of the required gas transport and the mechanism of  
354 transport are needed to evaluate the scaling of individual tracheal system structures. Plausibly the  
355 various steps in gas exchange scale similarly (a hypothesis of symmorphosis) as has been

356 suggested for mammalian respiratory systems (58), but resolution of this question in insects will  
357 require further study.

358         Diffusive capacities of the spiracles scaled with mass<sup>0.39</sup>, well below the scaling slope for  
359 resting oxygen consumption rate (approximately 0.75); thus, diffusion across the spiracles  
360 becomes more challenging for larger insects. The required O<sub>2</sub> gradient across the spiracles to  
361 supply the metabolic demand by diffusion increases by approximately an order of magnitude  
362 from our smallest to largest beetles, but the size effect on the required PO<sub>2</sub> gradient is less  
363 important than the effect of activity. For quiescent beetles, the PO<sub>2</sub> gradients across the spiracles  
364 necessary for diffusion are low (0.05-0.5 kPa depending on size). However, during endothermic  
365 flight, the required PO<sub>2</sub> gradient across the spiracles increases from 5 to 35 kPa for a scaling  
366 exponent of 0.67 or from 2 to 174 kPa for a scaling exponent of 1.19, which is impossible to  
367 achieve because the maximum partial pressure of oxygen in air is only 21 kPa. With metabolic  
368 rates scaling with mass<sup>0.75</sup> and spiracular depth with mass<sup>0.33</sup>, spiracular area would need to scale  
369 with mass<sup>1.08</sup> (0.75 + 0.33) to conserve the required PO<sub>2</sub> gradient to support diffusion across all  
370 insect sizes.

371         By contrast, advective capacity scales with mass<sup>1.1</sup>, exceeding or matching the scaling of  
372 flight metabolic rate, depending on insect size (50). Interpretation of these results is challenging  
373 as we do not know how ventilatory flow varies with size in insects. Ventilatory airflow is  
374 difficult to measure in insects, because there are so many spiracles, because these spiracles can  
375 be variably gated, and because flow can be tidal or unidirectional. If insects can match  
376 ventilation to flight metabolic rate across body size, then no changes in oxygen extraction  
377 efficiency will be necessary. If ventilatory airflow is matched to flight metabolic rate, then the  
378 scaling of advective capacities of the spiracles with an exponent of 1.1 implies that the pressures

379 required to drive convection either remain the same with size (if flight metabolic rate scales with  
380 an exponent near 1.1) or falls with size (if flight metabolic rate scales with an exponent of 0.67  
381 or 0.75, for example. Any conclusions on this topic must be very cautious because in the beetles  
382 that have been best-studied, ventilation during flight includes both tidal flow through some of the  
383 thoracic spiracles and unidirectional flow out the abdominal spiracles (59). The much larger size  
384 of the thoracic than abdominal spiracles suggests that ventilation of the flight muscles may be  
385 primarily tidal through the thoracic spiracles, with unidirectional flow out the abdominal  
386 spiracles supplying other parts of the body.

387         We also observe much tighter distributions in the scaling pattern for the area of the large  
388 anterior spiracles as compared to the smaller posterior ones. This result may suggest that the  
389 large anterior spiracles are more constrained in their morphology, since they presumably provide  
390 the gas exchange needed for metabolically demanding tissues like the flight muscle.

391         There are some important caveats when interpreting our data. Insect spiracles are  
392 morphologically complex structures. We made 3D measurements using tomographic imaging,  
393 but analyzed air transport capacities by modeling the spiracle as a cylinder, which could over or  
394 underestimate capacity depending on factors like valve position and the complex shape of the  
395 spiracular atrium. Furthermore, our CT scans were conducted on sacrificed specimens; the  
396 assessment of spiracles of living insects could offer insights not possible with static morphology.  
397 For example, living insects might control the shape of the bellows-like atrium and valves in a  
398 concerted way to promote air flow. As yet, we know little about how the tracheal system  
399 structure and function might scale differently in different species. As an example of a fairly  
400 dramatic difference in tracheal system function across beetle clades, some Cerambycid beetles  
401 use draft inward ventilation through the mesothoracic spiracle during flight, whereas most scarab

402 beetles autoventilate the thorax using wing movements (59, 60). Dung beetle species vary  
403 between exhaling nearly all to none of their air out the mesothoracic spiracles, with species from  
404 more arid environments exhibiting more expiration via the mesothoracic spiracle (61). Multiple  
405 beetle species collapse parts of their tracheal system to produce advective airflow, both in adults  
406 and as pupae (62-64). Though it is unclear how respiration via tracheal collapse differs with size  
407 and in different species, the prevalence of active breathing further highlights the need for  
408 advective airflow for insect function. The phylogenetic, life history, and environmental  
409 influences on tracheal system structure, function, and scaling seem likely to be a ripe area for  
410 future research.

411 Our finding of isometric scaling of insect spiracles would appear to differ from reports  
412 for tracheae of mammals, in which radius scales with mass<sup>0.39</sup> and lengths with mass<sup>0.27</sup> (65).  
413 However, confidence limits from our study included these scaling slopes, suggesting that  
414 respiratory scaling of tracheal morphology may be congruent across these disparate groups.  
415 Tenney and Bartlett's study (65) had greater power, as it examined 43 species ranging over 5  
416 orders of magnitude in body mass. However, it worth noting that they did not consider error in  
417 their slope estimates, test for statistical differences in slopes between the radii and lengths, or  
418 consider phylogeny, so the conclusion that mammalian tracheae scale non-isometrically (and  
419 differently from insect spiracles) could benefit from rigorous comparative analysis.

420 *Conclusions:* Insect spiracles scale with geometric isometry in beetles, which means that  
421 diffusive capacities increase much less than metabolic rates as body size increases, while  
422 advective capacities increase similarly or more rapidly than do metabolic rates. These are general  
423 principles of gas exchange that should apply to respiratory structures of any animal clade  
424 exhibiting isometric scaling. For resting insects, the required P<sub>O2</sub> gradient across the spiracles

425 necessary to supply resting oxygen consumption increases strongly with size, but remains small  
426 in even the largest insects, suggesting that resting gas exchange can be accomplished by  
427 diffusion even in very large insects. In contrast, our data clearly demonstrate that maximal  
428 aerobic flight cannot be accomplished by diffusion in large beetles.

#### 429 **Authors' contributions**

430 JW helped with study design, collected spiracle measurements from the micro-CT data,  
431 carried out statistical analyses, and drafted the manuscript and figures. JFH helped with study  
432 design, coordinated the study, and drafting the manuscript. CJK and JJS collected the micro-CT  
433 data; additionally, *Dynastes* data were collected in collaboration with HG and GC. MED helped  
434 develop methods for analysis of micro-CT data, and helped with phylogenetic correction  
435 analysis. JJS also helped draft the manuscript. All authors gave approval for publication.

#### 436 **Funding**

437 This research was supported in part by funds from the School of Life Sciences  
438 Undergraduate Research (SOLUR) Program through the School of Life Sciences at Arizona  
439 State University, Tempe Campus, and by NSF IOS 1122157 and 1558052.

## 440 References

- 441 1. Bonner JT. Why size matters: from bacteria to blue whales. Princeton, N.J.: Princeton University  
442 Press; 2006.
- 443 2. West GB. Scale: The Universal Laws of Growth, Innovation, Sustainability, and the Pace of Life in  
444 Organisms, Cities, Economics, and Companies. New York: Penguin Press; 2017.
- 445 3. Sibly RM, Brown JH, Kodric-Brown A. Metabolic Ecology: A Scaling Approach: Wiley-Blackwell;  
446 2012.
- 447 4. West GB, Brown JH, Enquist BJ. A general model for the origin of allometric scaling laws in  
448 biology. *Science*. 1997;274:122-6.
- 449 5. Gillooly JF, Gomez JP, Mavrodiev EV, Rong Y, McLamore ES. Body mass scaling of passive oxygen  
450 diffusion in endotherms and ectotherms. *Proceedings of the National Academy of Sciences*.  
451 2016;113(19):5340-5.
- 452 6. Kaiser A, Klok CJ, Socha JJ, Lee W-K, Quinlan MC, Harrison JF. Increase in tracheal investment  
453 with beetle size supports hypothesis of oxygen limitation on insect gigantism. *Proceedings of the*  
454 *National Academy of Sciences*. 2007;104(32):13198-203.
- 455 7. Lane SJ, Shishido CM, Moran AL, Tobalske BW, Arango CP, Woods HA. Upper limits to body size  
456 imposed by respiratory–structural trade-offs in Antarctic pycnogonids. *Proceedings of the Royal Society*  
457 *B: Biological Sciences*. 2017;284(1865).
- 458 8. Perry SF, Lambert M, Schmitz A. *Respiratory Biology of Animals. Evolutionary and Functional*  
459 *Morphology*. Oxford, U.K.: Oxford Press; 2019.
- 460 9. Banavar JR, Moses ME, Brown JH, Damuth J, Rinaldo A, Sibly RM, et al. A general basis for  
461 quarter-power scaling in animals. *Proceedings of the National Academy of Sciences*.  
462 2010;107(36):15816-20.
- 463 10. Glazier DS. Metabolic scaling in complex living systems. *Systems*. 2014;2(4):451-540.
- 464 11. Harrison JF. Do performance-safety trade-offs cause hypometric metabolic scaling in animals?  
465 *Trends Ecol Evol*. 2017;32(9):653-64.
- 466 12. Harrison JF. Approaches for testing hypotheses for the hypometric scaling of aerobic metabolic  
467 rate in animals. *American Journal of Physiology-Regulatory, Integrative and Comparative Physiology*.  
468 2018;315(5):R879-R94.
- 469 13. White CR, Kearney MR. Metabolic scaling in animals: methods, empirical results, and theoretical  
470 explanations. *Comprehensive Physiology*. 2014;4:231-56.
- 471 14. Peters RH. *The Ecological Implications of Body Size*. Cambridge: Cambridge University Press;  
472 1983.
- 473 15. Harrison JF, Kaiser A, VandenBrooks JM. Atmospheric oxygen level and the evolution of insect  
474 body size. *Proceedings of the Royal Society B-Biological Sciences*. 2010;277(1690):1937-46.
- 475 16. Vogt JF, Dillon ME. Allometric scaling of tracheal morphology among bumblebee sisters (*Apidae*:  
476 *Bombus*): compensation for oxygen limitation at large body sizes? *Physiol Biochem Zool*. 2013;86.
- 477 17. Harrison JF, Lafreniere JJ, Greenlee KJ. Ontogeny of tracheal dimensions and gas exchange  
478 capacities in the grasshopper, *Schistocerca americana*. *Comparative Biochemistry and Physiology a-*  
479 *Molecular & Integrative Physiology*. 2005;141(4):372-80.
- 480 18. Greenlee KJ, Henry JR, Kirkton SD, Westneat MW, Fezzaa K, Lee WK, et al. Synchrotron imaging  
481 of the grasshopper tracheal system: morphological components of tracheal hypermetry and the effect  
482 of age and stage on abdominal air sac volumes and convection. *American Journal of Physiology:*  
483 *Comparative, Regulatory and Integrative Physiology*. 2009;297:1343-50.
- 484 19. Ar A, Rahn H. **Pores in avian eggshells: gas conductance, gas exchange and embryonic growth**  
485 **rate**. *Respir Physiol*. 1985;61(1):1-20.

- 486 20. Toien O, Paganelli CV, Rahn H, Johnson RR. Diffusive resistance of avian eggshell pores. *Respir*  
487 *Physiol.* 1988;74:345-54.
- 488 21. Holt JP, Rhode EA, Holt WW, Kines H. Geometric similarity of aorta, venae cavae, and certain of  
489 their branches in mammals. *Am J Physiol.* 1981;241:100-4.
- 490 22. Stahl WR. Scaling of respiratory variables in mammals. *J Appl Physiol.* 1967;22(3):453-60.
- 491 23. Harrison JF, Wasserthal LT, Chapman RF. Gaseous exchange. In: Simpson SJ, Douglas AE, editors.  
492 *The Insects: Structure and Function.* 5th ed. New York: Cambridge University Press; 2013. p. 501-45.
- 493 24. Krogh A. Studien über Tracheenrespiration. II. über Gasdiffusion in den Tracheen. *Pflügers*  
494 *Archiv.* 1920;179:95-112.
- 495 25. Hetz SK, Bradley TJ. Insects breathe discontinuously to avoid oxygen toxicity. *Nature.*  
496 2005;433(7025):516-9.
- 497 26. Socha JJ, Forster TD, Greenlee KJ. Issues of convection in insect respiration: Insights from  
498 synchrotron X-ray imaging and beyond. *Respir Physiol Neurobiol.* 2010;173S:S65-S73.
- 499 27. Wasserthal LT, Cloetens P, Fink RH, Wasserthal LK. X-ray computed tomography study of the  
500 flight-adapted tracheal system in the blowfly *Calliphora vicina*, analysing the ventilation mechanism and  
501 flow-directing valves. *J Exp Biol.* 2018;221:1-12.
- 502 28. Heymann N, Lehmann F-O. The significance of spiracle conductance and spatial arrangement for  
503 flight muscle function and aerodynamic performance in flying *Drosophila*. *J Exp Biol.* 2006;209(9):1662-  
504 77.
- 505 29. Iwan D, Kamiński MJ, Raś M. The Last Breath: A  $\mu$ CT-based method for investigating the tracheal  
506 system in Hexapoda. *Arthropod Struct Dev.* 2015;44(3):218-27.
- 507 30. Socha JJ, DeCarlo F. Use of synchrotron tomography to image naturalistic anatomy in insects.  
508 *SPIE 2008;2008(Developments in X-Ray Tomography VI: San Diego, CA, USA):70780A-7.*
- 509 31. Sharma KS, Gong H, Ghasemalizadeh O, Yu H, Wang G, Cao G. Interior micro-CT with an offset  
510 detector. *Medical Physics.* 2014;41(6):061915.
- 511 32. Gong H LJ, Zhou O, & Cao G *Medical Imaging 2015: Physics of Medical Imaging*, (International  
512 Society for Optics and Photonics), p 94124N, editor Implementation of interior micro-CT on a carbon  
513 nanotube dynamic micro-CT scanner for lower radiation dose. *SPIE Medical Imaging*; 2015.
- 514 33. Garnier S. Package 'viridis' 2016 [Available from: [https://cran.microsoft.com/snapshot/2016-08-](https://cran.microsoft.com/snapshot/2016-08-05/web/packages/viridis/viridis.pdf)  
515 [05/web/packages/viridis/viridis.pdf](https://cran.microsoft.com/snapshot/2016-08-05/web/packages/viridis/viridis.pdf)].
- 516 34. Orme D. The caper package: comparative analysis of phylogenetics and evolution in R 2018  
517 [Available from: <https://cran.r-project.org/web/packages/caper/vignettes/caper.pdf>].
- 518 35. Pinheiro J, Bates D, DebRoy Sa, Sarkar D, Team RC. Linear and Nonlinear Mixed Effects Models  
519 2021 [Available from: <https://CRAN.R-project.org/package=nlme>].
- 520 36. Harmon LJ, Weir JT, Brock CD, Glor RE, Challenger W. GEIGER: investigating evolutionary  
521 radiations. *Bioinformatics.* 2008;24.
- 522 37. Revell LJ. phytools: an R package for phylogenetic comparative biology (and other things).  
523 *Methods Ecol Evol.* 2012;3.
- 524 38. Paradis E, Claude J, Strimmer K. APE: Analyses of Phylogenetics and Evolution in R language.  
525 *Bioinformatics.* 2004;20(2):289-90.
- 526 39. R-Core-Team. R: A language and environment for statistical computing Vienna, Austria: R  
527 Foundation for Statistical Computing; 2016 [Available from: <http://www.R-project.org/>].
- 528 40. R. P. Freckleton, P. H. Harvey, M. Pagel. Phylogenetic Analysis and Comparative Data: A Test and  
529 Review of Evidence. *The American Naturalist.* 2002;160(6):712-26.
- 530 41. Hunt T, Bergsten J, Levkanicova Z, Papadopoulou A, John OS, Wild R, et al. A comprehensive  
531 phylogeny of beetles reveals the evolutionary origins of a superradiation. *Science.* 2007;318(5858):1913-  
532 6.

- 533 42. Rowland JM, Miller KB. Phylogeny and systematics of the giant rhinoceros beetles  
534 (Scarabaeidae: Dynastini). *Insecta Mundi* 2012;0258-0263:1-15.
- 535 43. Holm E. On the genera of African Cetoniinae: *Anisorrhina* Westwood 1842, *Melinesthes* Kraatz  
536 1880 and *Inhambane Péringuey* 1907. *Tropical Zoology*. 1993;6(1):165-77.
- 537 44. Micó E, Morón MA, Šípek P, Galante E. Larval morphology enhances phylogenetic reconstruction  
538 in Cetoniidae (Coleoptera: Scarabaeoidea) and allows the interpretation of the evolution of larval  
539 feeding habits. *Syst Entomol*. 2008;33(1):128-44.
- 540 45. Bocak L, Barton C, Crampton-Platt A, Chesters D, Ahrens D, Vogler AP. Building the Coleoptera  
541 tree-of-life for >8000 species: composition of public DNA data and fit with Linnaean classification. *Syst*  
542 *Entomol*. 2014;39(1):97-110.
- 543 46. Lide DR, editor. *CRC Handbook of Chemistry and Physics*. 72 ed. Boca Raton: CRC Press; 1991.
- 544 47. Piiper J, Dejours P, Haab P, Rahn H. Concepts and basic quantities in gas exchange physiology.  
545 *Respir Physiol*. 1971;13:292-304.
- 546 48. Chown SL, Marais E, Terblanche JS, Klok CJ, Lighton JRB, Blackburn TM. Scaling of insect  
547 metabolic rate is inconsistent with the nutrient supply network model. *Funct Ecol*. 2007;21:282-90.
- 548 49. Niven JE, Scharlemann JPW. Do insect metabolic rates at rest and during flight scale with body  
549 mass? *Biol Lett*. 2005;1:346-9.
- 550 50. Duell ME, Klok CJ, Roubik DW, Harrison JF. Size-dependent scaling of insect flight metabolism  
551 reveals an energetic benefit to small body size. *Integr Comp Biol*. 2022;In Press.
- 552 51. Ehnes RB, Rall BC, Brose U. Phylogenetic grouping, curvature and metabolic scaling in terrestrial  
553 invertebrates. *Ecol Lett*. 2011;14(10):993-1000.
- 554 52. Capellini I, Venditti C, Barton RA. Phylogeny and metabolic scaling in mammals. *Ecology*.  
555 2010;91(9):2783-93.
- 556 53. Chappell MA. Thermoregulation and energetics of the green fig beetle (*Cotinus texana*) during  
557 flight and foraging behavior. *Physiol Zool*. 1984;57(6):581-9.
- 558 54. Rogowitz GL, Chappell MA. Energy metabolism of eucalyptus-boring beetles at rest and during  
559 locomotion: gender makes a difference. *J Exp Biol*. 2000;203:1131-9.
- 560 55. Auerswald L, Schneider P, Gäde G. Proline powers pre-flight warm-up in the African fruit beetle  
561 *Pachnoda sinuata* (Cetoniinae). *J Exp Biol*. 1998;201(10):1651-7.
- 562 56. Harrison JF. Ventilatory mechanism and control in grasshoppers. *Am Zool*. 1997;37:73-81.
- 563 57. Lundquist TA, Kittilson JD, Ahsan R, Greenlee KJ. The effect of within-instar development on  
564 tracheal diameter and hypoxia-inducible factors  $\alpha$  and  $\beta$  in the tobacco hornworm, *Manduca sexta*. *J*  
565 *Insect Physiol*. 2018;106:199-208.
- 566 58. Weibel ER, Taylor CR, Hoppeler H. The concept of symmorphosis: a testable hypothesis of  
567 structure-function relationship. *Proceedings of the National Academy of Science, USA*. 1991;88:10357-  
568 61.
- 569 59. Miller PL. The supply of oxygen to the active flight muscles of some large beetles. *J Exp Biol*.  
570 1966;45:285-304.
- 571 60. Amos WB, Miller PL. The supply of oxygen to the active flight muscles of *Petrognathus gigas* (F.)  
572 (Cerambycidae). *Entomologist*. 1965;98:88-94.
- 573 61. Duncan FD, Byrne MJ. The role of the mesothoracic spiracles in respiration in flighted and  
574 flightless dung beetles. *J Exp Biol*. 2005;208(5):907-14.
- 575 62. Pendar H, Kenny MC, Socha JJ. Tracheal compression in pupae of the beetle *Zophobas morio*.  
576 *Biol Lett*. 2015;11(6):20150259-.
- 577 63. Socha JJ, Lee W-K, Harrison JF, Waters JS, Fezzaa K, Westneat MW. Correlated patterns of  
578 tracheal compression and convective gas exchange in a carabid beetle. *J Exp Biol*. 2008;211(21):3409-20.



- 579 64. Waters JS, Lee WK, Westneat MW, Socha JJ. Dynamics of tracheal compression in the horned  
580 passalus beetle. *American Journal of Physiology: Regulatory, Integrative and Comparative Physiology*.  
581 2013;304:R621-R7.
- 582 65. Tenney SM, Bartlett D. Comparative quantitative morphology of the mammalian lung: Trachea.  
583 *Respir Physiol*. 1967;3(2):130-5.
- 584

## 585 **Figure Legends**

586 Figure 1. Scarab beetles include large bodied individuals and have eight spiracles. (a)  
587 Phylogenetic tree for the scarab beetles used in this study showing size distribution among clades  
588 (branch lengths are meaningless). (b) Location of the eight spiracles in the scarab body. (c) 3D  
589 reconstruction of the tracheal trunks in the thorax, legs and abdomen of *Dicronorrhina derbyana*;  
590 spiracles are shown in white. The larger images of spiracles show the size of the opening (dark in  
591 color) compared to the mushroom-shaped (white) atrium behind and the differences in spiracle  
592 shape. (d) Transverse x-ray slice through the third abdominal spiracle with diameter,  $\alpha$ , and  
593 depth,  $\beta$ , measures illustrated.

594 Figure 2. Isometric scaling of scarab beetle spiracles. Spiracle area scales with geometric  
595 isometry (A, B), with much tighter distribution about the isometric model for the large anterior  
596 spiracles compared to the smaller posterior spiracles. In A, B, D and E, the light grey lines show  
597 isometric scaling (slopes of 0.67 for area and 0.33 for depth). C shows estimates for the  
598 variability for regression models for the various spiracles (S mesothoracic, T metathoracic, 1-6  
599 abdominal), calculated as the standard deviation divided by  $10^{\text{regression intercept}}$ , which represents the  
600 spiracle area for a 1g beetle. Black diamond and line show the median and 2.5<sup>th</sup>-97<sup>th</sup> residual  
601 standard deviation divided by  $10^{\text{regression intercept}}$  calculated on non-parametric bootstrap samples.  
602 The white diamond and grey interval represent the median and 3<sup>rd</sup>-97<sup>th</sup> highest posterior density  
603 interval for the standard deviation divided by  $10^{\text{regression intercept}}$  calculated from parameter samples  
604 from the Bayesian regression. We see a trend towards much higher variability in posterior  
605 spiracle area as compared to anterior. In contrast to spiracle area, spiracle depth shows similar  
606 variability in all spiracles (D-F) regardless of position.

607 Figure 3. Scaling of the spiracles is insufficient for diffusive capacities across the spiracles to  
608 match expected increases in metabolic rate, so for pure diffusive gas exchange, the required  
609 partial pressure for oxygen must increase with size. In contrast, advective capacities through the  
610 spiracles likely match or exceed the scaling of flight metabolic rate. (a) The  $\log_{10}$  of total  
611 spiracular diffusive capacity per beetle ( $\text{nmol s}^{-1} \text{kPa}^{-1}$ ) increases with beetle size, with a slope  
612 estimated as 0.39. This slope was not significantly different from the 0.33 predicted from  
613 isometric scaling. The upper 95% confidence limit for the slope was 0.505, lower than any  
614 reported metabolic scaling slopes for insects. A metabolic rate slope of 0.75, commonly found  
615 for resting insects and animals more generally, is shown in light grey. (b) The  $\log_{10}$   $\text{PO}_2$  gradient  
616 (kPa) across the spiracles required to diffusively supply the oxygen demand of beetles increases  
617 with beetle size. The lower, purple line shows the estimated  $\text{PO}_2$  gradient across the spiracles to  
618 support diffusive gas exchange at rest; this increases from approximately 0.05 to 0.49 kPa as  
619 beetles increase in body size across this range. The less steeply upward sloping greenish and  
620 steeper yellow lines shows the estimated  $\text{PO}_2$  gradient across the spiracles during flight,  
621 assuming a 90x aerobic scope if flight metabolic rates scale with an exponent of 0.67 or 1.19, as  
622 found for large insects and small insects respectively (50). The upper grey band indicates where  
623 the partial pressure of oxygen needed for calculated beetle metabolic demand exceeds the 21 kPa  
624 atmospheric oxygen level (c) Hypermetric scaling of  $\log_{10}$  summed advective capacity ( $\text{m}^3 \text{s}^{-1}$   
625  $\cdot \text{kPa}^{-1}$ ) versus  $\log_{10}$ (body mass). There are uncertainties in the scaling of metabolic rate in flying  
626 insects: depending on size and study, slopes have ranged from 0.67 to 1.19. Confidence limits for  
627 advecting capacity include 1.19 but not 0.67. Equations of regression lines and confidence  
628 intervals for the slopes are shown for each plot.

## 629 **Supplemental Materials**

630 Supplemental figure 1. Non-identifiability of phylogenetic signal parameter in pGLS regression  
631 model. Left-hand column shows both OLS regression and pGLS regression models plotted for a  
632 given spiracle morphology (log of area, depth, area/depth, or area<sup>2</sup>/depth) vs log of mass. The  
633 Right-hand column shows the log likelihood space for the parameter  $\lambda$ , which scales the off-  
634 diagonal covariance terms of the regression model thereby providing an indication of how  
635 strongly phylogeny influences the pattern of data distribution. A  $\lambda$  of one indicates strong  
636 phylogenetic signal whereas a value of zero indicates no sign of covariance in the data due to  
637 phylogeny. The solid red line indicates the maximum likelihood for the parameter used in the  
638 model on the left, the dashed red line indicates confidence interval estimates for the parameter  
639 value. Note that the log likelihood for the parameter is fairly flat across large section of the  
640 possible parameter space, and all confidence intervals on the parameter include zero (no  
641 phylogenetic signal). Together, these indicate that many values for  $\lambda$  are similarly likely, and that  
642 the strength of the phylogenetic signal is hence non-identifiable (our data does not strongly  
643 inform the parameter). Given the weakly-to-non-peaked likelihood distributions, selecting a  
644 particular value for  $\lambda$  to use in the model is a largely arbitrary choice, poorly supported by the  
645 data.

646  
647 Supplementary figure 2. Non-identifiability of the phylogenetic signal parameter as indicated by  
648 Bayesian modeling. We constructed a generative model for our data (a multivariate normal  
649 distribution with covariance matrix given by the phylogenetic signal) which is analogous to the  
650 model assumed in pGLS regression. We included a parameter for  $\lambda$  that scaled the off-diagonal  
651 terms of the covariance matrix, analogous to pGLS, and sampled from our model for the various

652 regressions of log spiracle morphology versus log mass. We then plotted the prior for the  $\lambda$   
653 parameter (a beta distribution with shape parameters 1.4 and 1.4) against the samples from HMC  
654 sampling. This indicated that the samples for this parameter had no shrinkage: the posterior  
655 samples for the parameter matched the prior. This indicates that the data does not inform this  
656 parameter, a clear indication that the parameter is entirely non-identifiable given our data.  
657 Together, with supplemental figure 1, this indicates that the phylogenetic signal is not  
658 informative for our models and does not provide useful information or insight to our analysis.  
659  
660 Supplementary figure 3. Slopes, intercepts, standard deviations, and quasi-coefficient of  
661 variation with confidence intervals generated via non-parametric bootstrapping or Bayesian  
662 regression for all spiracles and area, depth, area/depth, or area<sup>2</sup>/depth vs mass. All spiracles  
663 scaled isometrically. The anterior spiracles are much larger than the posterior ones and hence  
664 provide much of the gas exchange capacity for the animal. They also exhibit a much tighter  
665 distribution for their area and gas exchange capacity than the posterior ones. The spiracle depth,  
666 however, did not show the same level of variation in dimension; all spiracular depths had similar  
667 degree of variation. This suggests there may be tighter selective regulation on the morphology of  
668 the large spiracles that likely supply the airflow needed for highly metabolically demanding  
669 tissue like the flight muscle, legs, and brain.  
670  
671 Supplementary figure 4. Regression plots for both Bayesian and non-parametric bootstrap  
672 analyses. The top set of panels provide results for Bayesian linear regression; the light grey  
673 bands provide the 80<sup>th</sup> and 95<sup>th</sup> percentile for the posterior predictive distribution for the  
674 regression model, the dark grey interval shows the 95<sup>th</sup> percentile for regression line ranges given

675 by the slope and intercept samples, the black line the 10<sup>th</sup> percentile for these regression lines.  
676 The bottom panels show regression results from non-parametric bootstrap replicates drawn from  
677 the data, with ordinary least squares regression as the summary statistic applied to the  
678 subsamples. The grey interval shows the 95<sup>th</sup> percentile for the regression lines generated by the  
679 bootstrap sampling. The repeated light grey lines in both sets of figures indicate the theoretical  
680 isometric slope value for the regression of a given morphological trait.

681

682 Supplementary table 1. The measurements made on each spiracle for each beetle.

683 Supplementary table 2. Area and depth measurements for each spiracle for each beetle.

684 Supplementary table 3. Conductances for diffusion and advection for each spiracle for each  
685 beetle.

686 Supplementary table 4. Intercepts and slopes for scaling relationships (log-log plots) for  
687 morphologies (spiracular areas and depths), conductances, and P<sub>O2</sub> gradients across the spiracles,  
688 including confidence limits, for each spiracle and for all spiracles combined.

689 Supplementary table 5. Summed spiracular areas and average spiracular depths, summed  
690 conductances, and estimated average P<sub>O2</sub> gradients across all the spiracles, for each beetle  
691 species, estimated at rest and during flight if flight metabolic rate scale with mass<sup>0.67</sup> or mass<sup>1.19</sup>.

692

693 Supplementary video: Reconstruction of the spiracles and connecting tracheal trunks on one side  
694 of the scarab beetle *Dicronorhina derbyana*.

695

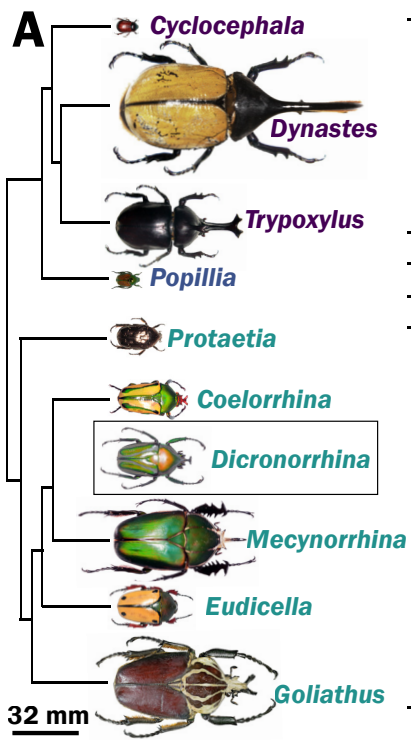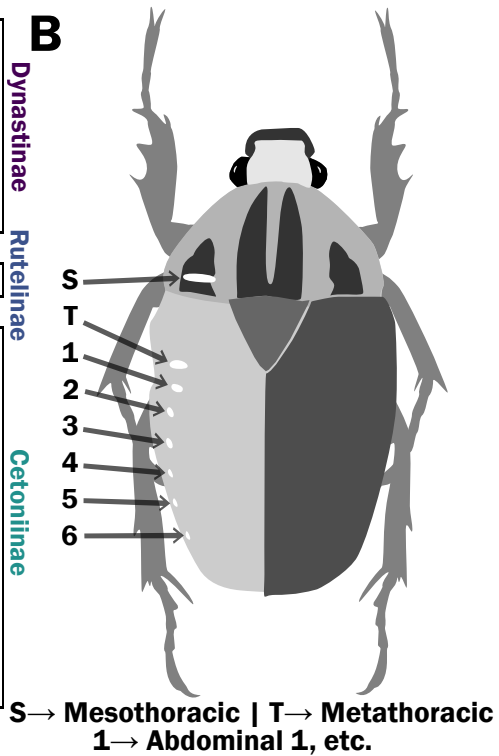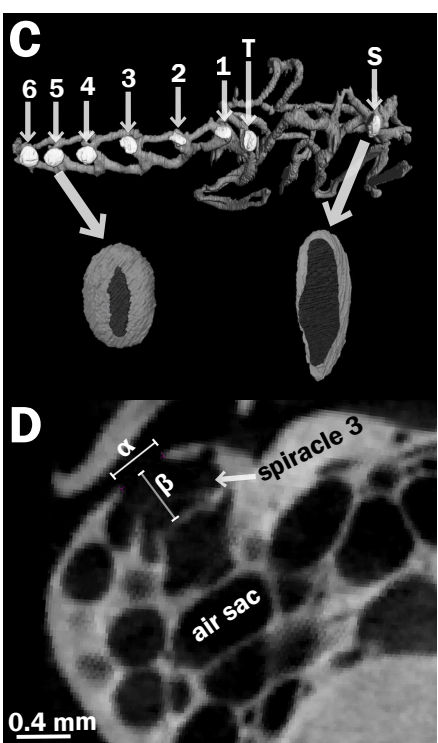

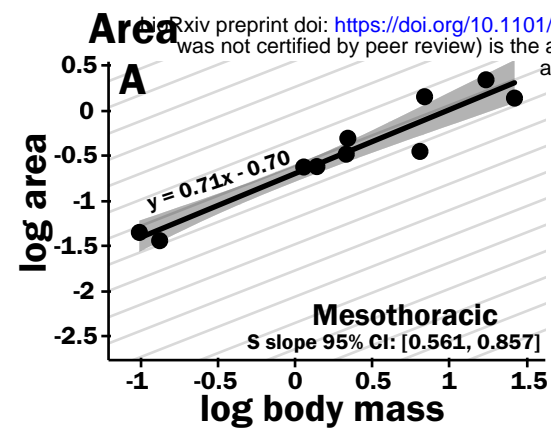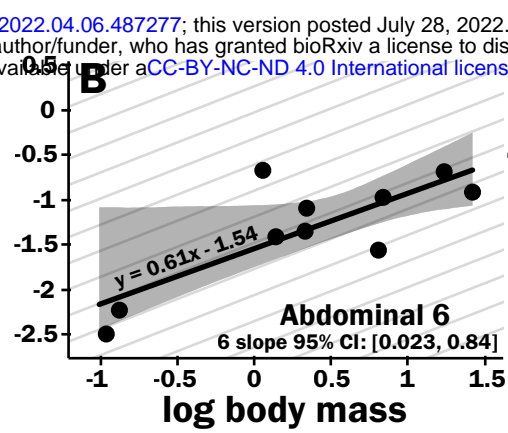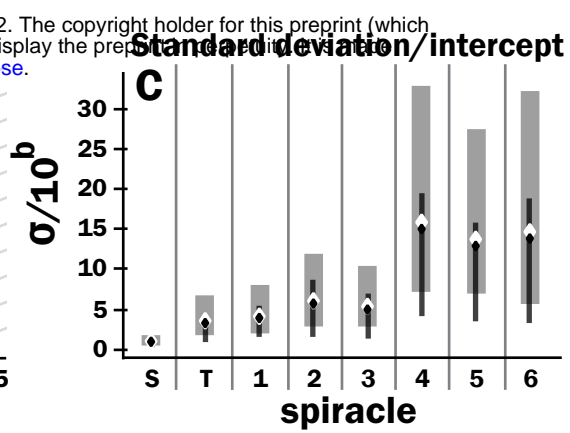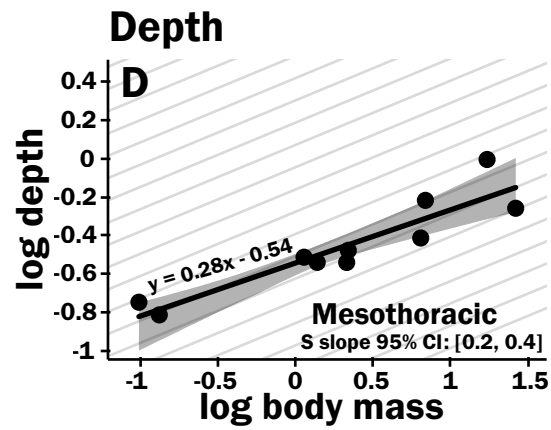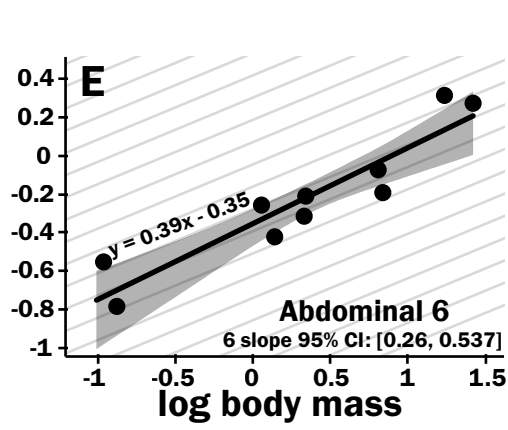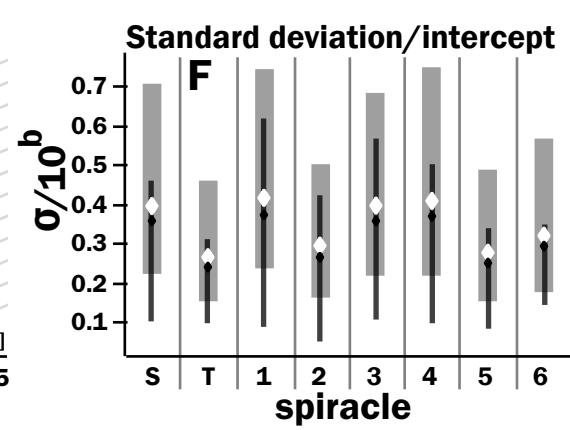



## Diffusing Capacity

## Required $\Delta P_{O_2}$

## Advecting Capacity

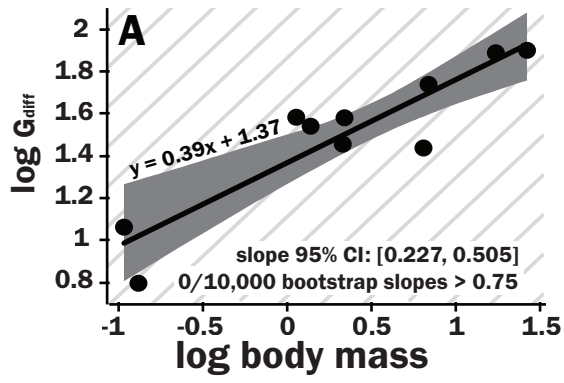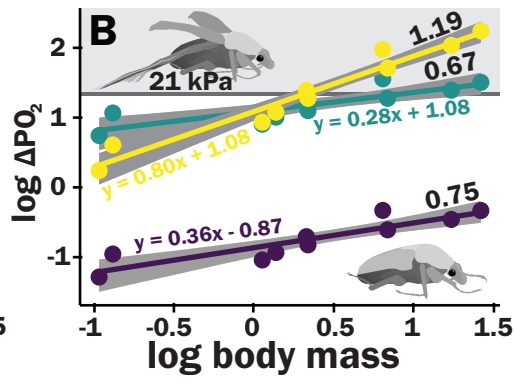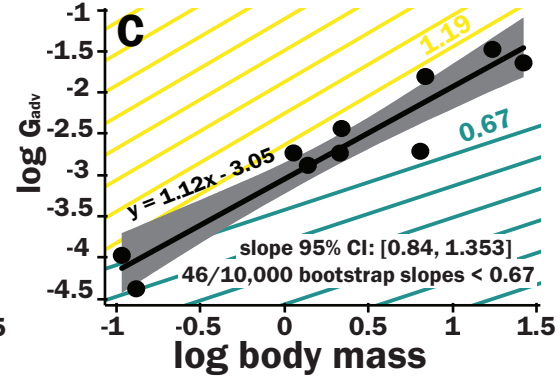

Source: https://www.biorxiv.org/content/10.1101/2022.04.06.487277v2.full.pdf
